# Supplementary material for: High-resolution air quality maps for Bucharest using Mixed-Effects Modeling Framework
Source: Copernicus journal article supplement (doi:10.5194/egusphere-2024-2930), 2024-11-20
Supplement: Supplementary file [file egusphere-2024-2930-AC4-supplement.pdf]

Dear editor,

Here are some technical and minor language corrections from the authors. In the following "AuthCM" represents the author's changes to the manuscript. Page and line number refer to the page and line number in the version submitted for discussion.

## **Technical corrections**

### **Comment 1.**

AuthCM: Page 9, lines 230-231 The RMSE values were corrected. In the original document, the MSE (mean squared error) was listed as the RMSE value."

### **Comment 2.**

AuthCM: Page 18, lines 368-369: Corrected the surname of the main author "Talinau" to "Talianu"
